# Supplementary material for: Extraction of cellulose from restaurant food waste
Source: Royal Society of Chemistry journal article supplement (doi:10.1039/d3su00192j), 2023-11-25
Supplement: d3su00192j1.pdf [file d3su00192j1.pdf]

## Extraction of Cellulose from Restaurant Food Waste

Matthew T. Garnett<sup>1</sup>, Harrish Kumar Senthil Kumar<sup>1</sup>, Bryan S. Beckingham<sup>1</sup>, and Symone L. M. Alexander<sup>1\*</sup>

<sup>1</sup> Department of Chemical Engineering, Auburn University, Auburn, AL, USA

**\* Correspondence:**  
Corresponding Author

Symone Alexander, 212 Ross Hall, Auburn, AL 36849, USA, sla0044@auburn.edu

**Keywords:** cellulose, biopolymers, extraction, food waste, pomace.

Supplementary Material

### Tables

**Supplementary Table S1:** List of fruits and vegetables on the menu for the I Love Juice Bar®

| <b>Fruits:</b> | <b>Vegetables:</b> |
|----------------|--------------------|
| acai           | basil              |
| apple          | beets              |
| avocado        | bell pepper        |
| banana         | carrot             |
| blueberry      | celery             |
| cucumber       | chickpeas          |
| lemon          | corn               |
| mango          | ginger             |
| orange         | kale               |
| pineapple      | lentils            |
| strawberry     | mint               |
| tomato         | parsley            |
| zucchini       | spinach            |
|                | squash             |
|                | wheatgrass         |

**Supplementary Table S2:** Yields of extracted cellulose – Mixed food waste on average yielded 4.41% cellulose utilizing the acid/base procedure.

**Experimental Run:      Weight of Food      Weight of Extracted      Yield:**

|   | <b>Waste:</b> | <b>Sample:</b> |       |
|---|---------------|----------------|-------|
| 1 | 300.00 g      | 12.20 g        | 4.01% |
| 2 | 300.01 g      | 10.79 g        | 3.60% |
| 3 | 300.29 g      | 10.90 g        | 3.63% |
| 4 | 300.28 g      | 13.75 g        | 4.58% |
| 5 | 300.51 g      | 15.97 g        | 5.32% |
| 6 | 300.03 g      | 15.95 g        | 5.32% |

**Supplementary Table S3: Determination of Viscosity from Ubbelohde Viscometer -** Viscosity values determined for 0.5 wt% control and 0.5 wt% extracted cellulose in 50 mL of 0.5 M Cupriethylenediamine (CED) solution. The concentration of the solution was 0.005 g/mL.

| <b>Sample:</b>               | <b>Kinematic Viscosity (cP):</b> | <b>Relative Viscosity:</b> | <b>Specific Viscosity:</b> | <b>Intrinsic Viscosity (mL/g):</b> | <b>Density (g/cm<sup>3</sup>):</b> |
|------------------------------|----------------------------------|----------------------------|----------------------------|------------------------------------|------------------------------------|
| Control Cellulose Solution   | 1.798 ± 0.019                    | 1.234                      | 0.234                      | 43.562                             | 1.055                              |
| Extracted Cellulose Solution | 1.687 ± 0.066                    | 1.046                      | 0.046                      | 9.074                              | 1.055                              |
| 0.5 M CED Solutuion          | 1.463 ± 0.019                    |                            |                            |                                    | 1.052                              |

**Supplementary Table S4:** Crystallinity index of the cellulose samples by X-ray Diffraction & mean size of ordered crystalline domains.

| <b>Sample</b>            | <b><i>CrI</i> (%)</b> | <b>FWHM (rad)</b> | <b><math>\tau</math> (Å)</b> |
|--------------------------|-----------------------|-------------------|------------------------------|
| Microcrystalline Control | 61                    | 0.035             | 45.0                         |
| Fibrous Control          | 61                    | 0.021             | 75.2                         |
| Extracted Cellulose      | 16                    | 0.024             | 64.4                         |

**Figures**

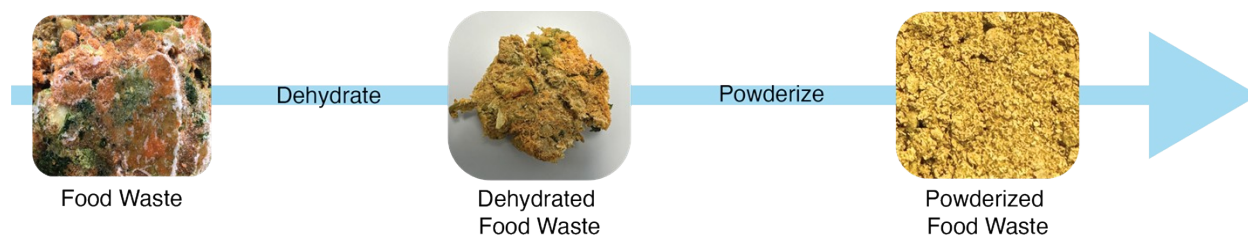

**Supplementary Figure 1:** Approximately 50 lbs of an assortment of fruit and vegetable waste was collected from a local restaurant and processed for the extraction of biopolymers. After collection, the food waste was dehydrated for approximately 14 hours, prior to being pulverized into a powder for use in the acid/base extraction procedure.

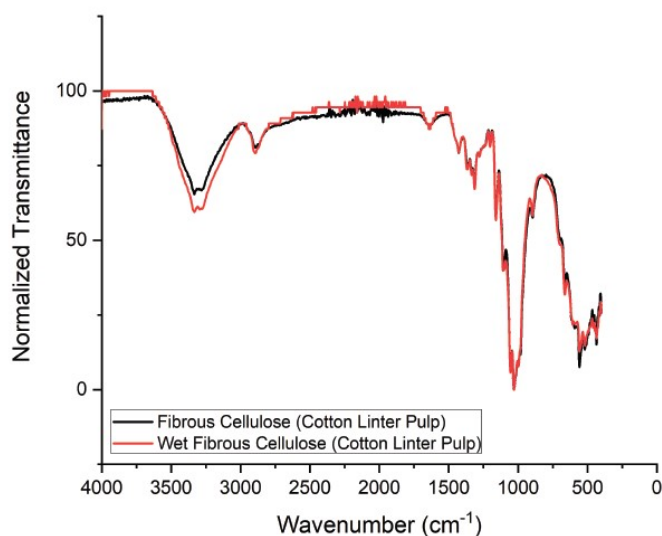

**Supplementary Figure 2:** FTIR Spectroscopy was performed on both a dry cellulose and wet cellulose sample that had been air-dried. The main difference between the two samples can be observed at the  $3300 \text{ cm}^{-1}$  peak with difference in stretching vibrations. This is due to the presence of  $-\text{OH}$  groups from water molecules.

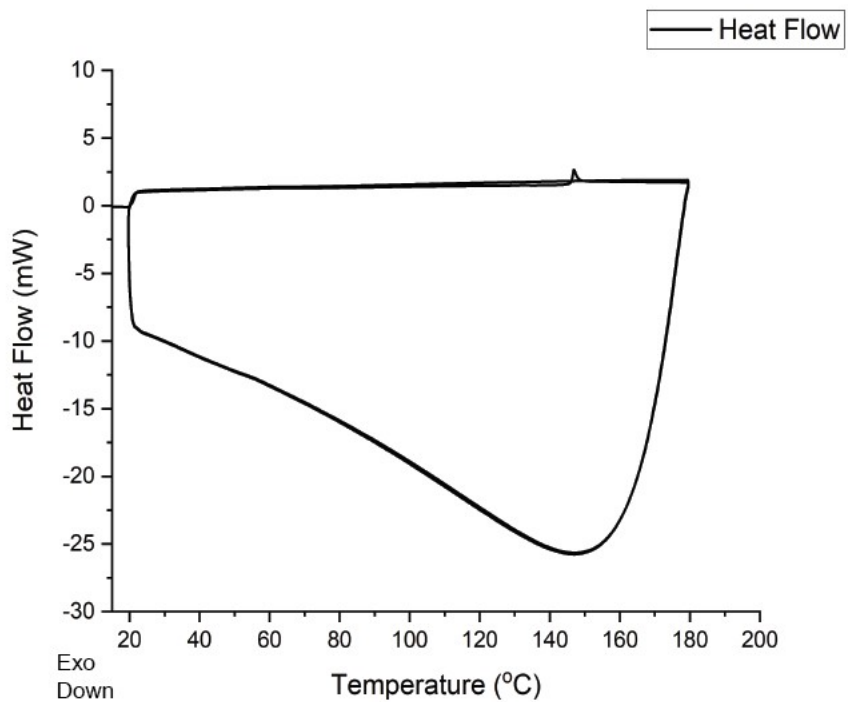

**Supplementary Figure 3:** DSC of Cellulose from Mixed Food Waste – DSC was performed on the extracted cellulose sample to determine the glass transition temperature with a heat/cool/heat cycle from 20-180°C at a 5°C/min ramp.
